# Supplementary material for: CO2 Signaling through the Ptc2-Ssn3 Axis Governs Sustained Hyphal Development of Candida albicans by Reducing Ume6 Phosphorylation and Degradation
Source: PubMed Central journal article supplement (PMC6336421; doi:10.1128/mbio.02320-18), 2019-01-15
Supplement: mBio.02320-18-sf001.pdf [file mBio.02320-18-sf001.pdf]

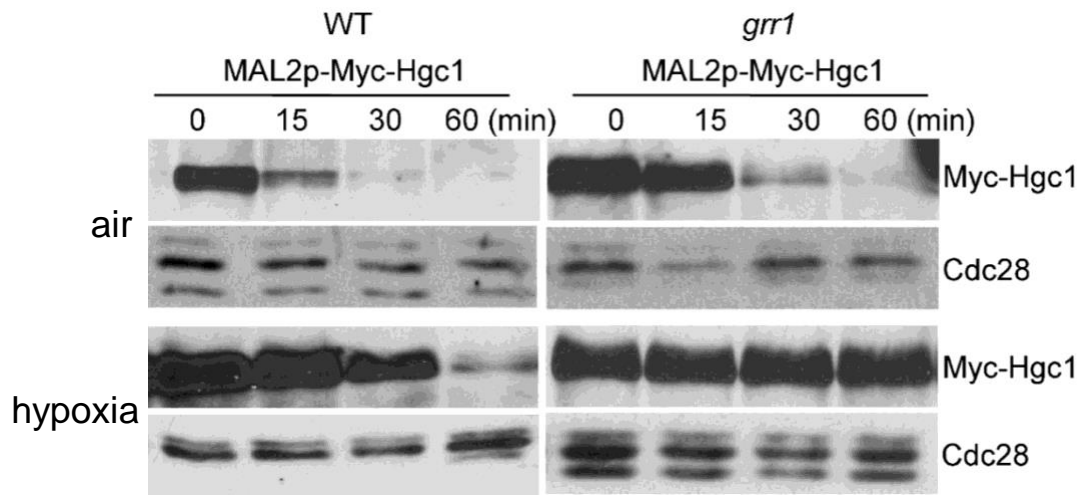

Fig S1. Hgc1 is stabilized in hypoxia in the *grr1* mutant.
