# Supplementary material for: CO2 Signaling through the Ptc2-Ssn3 Axis Governs Sustained Hyphal Development of Candida albicans by Reducing Ume6 Phosphorylation and Degradation
Source: PubMed Central journal article supplement (PMC6336421; doi:10.1128/mbio.02320-18), 2019-01-15
Supplement: mBio.02320-18-st001.pdf [file mBio.02320-18-st001.pdf]

Table S1. *C. albicans* stains used in this study

| Strain      | Parent / background | Genotype                                                                                                                                    | Source     |
|-------------|---------------------|---------------------------------------------------------------------------------------------------------------------------------------------|------------|
| SC5314      |                     | Wild type                                                                                                                                   | (1)        |
| CAI4        | SC5314              | <i>ura3::1 imm434/ura3::1 imm434</i>                                                                                                        | (1)        |
| BWP17       | SC5314              | <i>ura3::1 imm434/ura3::1 imm434 his1::hisG/his1::hisG arg4::hisG/arg4::hisG</i>                                                            | (2)        |
| HLY4176     | CAI4                | <i>ura3::1 imm434/ura3::1 imm434 MET3/met3::MET3p-UME6<sub>C778/785S</sub>-13MYC-URA3</i>                                                   | (3)        |
| HLY3578     | BWP17               | <i>ura3::1 imm434/ura3::1 imm434 his1::hisG/his1::hisG arg4::hisG/arg4::hisG ADE2/ade2::MAL2p-MYC-HGC1-URA3</i>                             | (4)        |
| YLC12       | HLY4176             | <i>ura3::1 imm434/ura3::1 imm434 MET3/met3::MET3p-UME6<sub>C778/785S</sub>,<sub>S437A</sub>-13MYC-URA3</i>                                  | This study |
| YLC13       | SN250               | <i>UME6<sub>S437A</sub>::UME6<sub>S437A</sub> ENO1::CAS9-SAT1</i>                                                                           | This study |
| SN250       | SC5314              | <i>his1Δ/his1Δ, leu2Δ::C.d. HIS1/leu2Δ::C.m. LEU2, arg4Δ/arg4Δ, URA3/ura3Δ::imm434 IRO1/iro1Δ::imm434</i>                                   | (5)        |
| <i>ptc2</i> | SN250               | <i>his1Δ/his1Δ, leu2Δ::C.d. HIS1/leu2Δ::C.m. LEU2, arg4Δ/arg4Δ, URA3/ura3Δ::imm434 IRO1/iro1Δ::imm434 ptc2Δ::C.d. HIS1/ptc2Δ::C.m. LEU2</i> | (5)        |
| YLC15       | SN250               | <i>his1Δ/his1Δ, leu2Δ::C.d. HIS1/leu2Δ::C.m. LEU2, arg4Δ/arg4Δ, ura3Δ/ura3Δ::imm434 IRO1/iro1Δ::imm434 SSN3::SSN3-13MYC-URA3</i>            | This study |
| HLY4080     | BWP17               | <i>ubr1::ARG4/ubr1::HIS1 ura3::1 imm434/ura3::1 imm434 his1::hisG/his1::hisG arg4::hisG/arg4::hisG</i>                                      | This study |
| HLY3586     | SN148               | <i>ura3::imm434/ura3::imm434 iro1::imm434/iro1::imm434 grr1::C.d.HIS1/grr1::C.m.LEU2 arg4Δ/arg4Δ leu2Δ/leu2Δ his1Δ/his1Δ</i>                | (4)        |

## References

1. Fonzi, W. A. & Irwin, M. Y. (1993) *Genetics* **134**, 717-28.
2. Wilson, R. B., Davis, D. & Mitchell, A. P. (1999) *J Bacteriol* **181**, 1868-74.
3. Lu, Y., Su, C., Solis, N. V., Filler, S. G. & Liu, H. (2003) *Cell Host & Microbe* **14**, 499-509
4. Wang, A., Lane, S., Tian, Z., Sharon, A., Hazan, I. & Liu, H. (2007) *Eukaryot Cell* **6**, 253-61.
5. Noble, S, M., French, S., Kohn, L, A., Chen, V., & Johnson, A, D. (2010) *Nat Genet* **42**, 590-8
