# Supplementary material for: CO2 Signaling through the Ptc2-Ssn3 Axis Governs Sustained Hyphal Development of Candida albicans by Reducing Ume6 Phosphorylation and Degradation
Source: PubMed Central journal article supplement (PMC6336421; doi:10.1128/mbio.02320-18), 2019-01-15
Supplement: mBio.02320-18-st002.pdf [file mBio.02320-18-st002.pdf]

Table S2. Primers used in this study

| Primer | Sequence                                                        |
|--------|-----------------------------------------------------------------|
| 1      | AAATACCCTCCCCAGAAAACGGATCCATGATTACCCATATGGTTAC                  |
| 2      | GTACGTGTGATGATGATGATGCTGATGGTTGATATATATGATGTGG                  |
| 3      | G TTCACCGTTAATTAACCCGGGAACGCGTCGATCATTGGTTATATCATTAC            |
| 4      | CAACCATCAGCATCATCATCATCACACGTACGTCACAATAAAATCAC                 |
| 5      | ATTTGCTACCAACTATATACTACG                                        |
| 6      | AAAACGTAGTATATATAGTTGGTAGC                                      |
| 7      | ATGCTTAATCCACTTTACCATTATCCAAGTCTACTGCACATCATATATATCAACCAT       |
| 8      | GTGATTTTATTGTGACGTACGTGTGATGCTGATGATGCTGATGGTTGATATATATG<br>ATG |
| 9      | GGGAACAAAAGCTGGGTACCGGGCCCGCATTGTTCTGCTCATAGAGAC                |
| 10     | CTAGAAAGTATAGGAACTTCCTCGAGGTAACCTCAAAGAGAACCATCC                |
| 11     | GGAAGATCTCGACGCGTACAGATATCGACTACAAAGACCATGACGG                  |
| 12     | CGGGGTACCCTACTTGTGCATCGTCATCCT                                  |
| 13     | CAACAAATACAAAACAAGGAGATCTATGGGTCAAATCCTTTCACAAC                 |
| 14     | GGTCTTTGTAGTCGATATCTGTACGCGTAACTTCATCATCTATTTTTTCAG             |
